# Supplementary material for: Analysis of the lymph node metastasis distribution in patients with invasive resectable non-small cell lung cancer
Source: PubMed Central journal article supplement — Transl Lung Cancer Res. 2024 Nov 28;13(11):3039–49. doi: 10.21037/tlcr-24-450 (PMC11632436; doi:10.21037/tlcr-24-450), 2024-11-28
Supplement: tlcr-13-11-3039-supplementary.pdf [file tlcr-13-11-3039-supplementary.pdf]

**Table S1** LNM rates (%) of the enrolled patients who were diagnosed with adenocarcinomas (N=1146)

| Nodal station | Overall | Tumor location |            |                    | Lobes of lung |     |     |     |      |                     | 8th pathological T status |      |      |               |                    | 8th clinical T status |      |      |               |                     |
|---------------|---------|----------------|------------|--------------------|---------------|-----|-----|-----|------|---------------------|---------------------------|------|------|---------------|--------------------|-----------------------|------|------|---------------|---------------------|
|               |         | Central        | Peripheral | P                  | LUL           | LLL | RUL | RML | RLL  | P                   | pT1a                      | pT1b | pT1c | pT2 and above | P                  | cT1a                  | cT1b | cT1c | cT2 and above | P                   |
| 2R/2L         | 3.9     | 8.8            | 3.3        | 0.002              | –             | –   | 2.8 | 4.4 | 7.9  | 0.007 <sup>a</sup>  | 0.0                       | 2.3  | 2.5  | 11.9          | <0.001             | 0.0                   | 2.8  | 5.9  | 8.7           | <0.001              |
| 3A/3P         | 2.4     | 0.0            | 4.0        | 0.61 <sup>a</sup>  | 0.0           | 0.0 | 0.0 | 0.0 | 10.0 | 0.32 <sup>a</sup>   | 0.0                       | 0.0  | 0.0  | 6.7           | >0.99 <sup>a</sup> | 0.0                   | 0.0  | 11.1 | 0.0           | 0.37 <sup>a</sup>   |
| 4R/4L         | 1.8     | 5.7            | 1.1        | 0.09 <sup>a</sup>  | 2.7           | 6.7 | 0.6 | 4.8 | 2.1  | 0.09 <sup>a</sup>   | 0.0                       | 1.3  | 0.0  | 4.8           | 0.17 <sup>a</sup>  | 0.0                   | 2.1  | 0.0  | 5.2           | 0.11 <sup>a</sup>   |
| L5            | 2.5     | 6.8            | 2.0        | 0.08 <sup>a</sup>  | 3.7           | 0.0 | –   | –   | –    | 0.046 <sup>a</sup>  | 0.0                       | 2.7  | 0.9  | 5.8           | 0.09 <sup>a</sup>  | 1.1                   | 2.5  | 2.3  | 5.8           | 0.10 <sup>a</sup>   |
| L6            | 2.5     | 0.0            | 3.0        | >0.99 <sup>a</sup> | 2.3           | 3.7 | 0.0 | 0.0 | 0.0  | 0.53 <sup>a</sup>   | 0.0                       | 1.2  | 3.3  | 6.9           | 0.23 <sup>a</sup>  | 0.0                   | 1.4  | 0.0  | 17.6          | 0.005 <sup>a</sup>  |
| L7            | 2.6     | 6.8            | 2.0        | <0.001             | 1.3           | 2.1 | 0.9 | 4.0 | 5.6  | <0.001 <sup>a</sup> | 0.0                       | 1.0  | 3.1  | 8.8           | <0.001             | 0.7                   | 1.1  | 2.9  | 11.3          | <0.001              |
| L8            | 2.1     | 0.0            | 2.4        | >0.99 <sup>a</sup> | 0.0           | 0.0 | 0.0 | 0.0 | 4.2  | 0.73 <sup>a</sup>   | 0.0                       | 0.0  | 0.0  | 7.1           | 0.26               | 0.0                   | 0.0  | 7.1  | 5.0           | 0.19 <sup>a</sup>   |
| L9            | 1.6     | 5.7            | 1.0        | 0.04 <sup>a</sup>  | 0.0           | 0.9 | 0.0 | 0.0 | 2.9  | 0.45 <sup>a</sup>   | 0.0                       | 0.4  | 0.9  | 7.3           | 0.001 <sup>a</sup> | 0.0                   | 0.7  | 0.0  | 10.2          | <0.001 <sup>a</sup> |
| L10           | 3.1     | 7.2            | 2.6        | <0.001             | 3.9           | 2.7 | 1.8 | 3.0 | 4.9  | 0.009 <sup>a</sup>  | 0.2                       | 1.0  | 2.5  | 11.2          | <0.001             | 1.2                   | 1.2  | 5.1  | 10.3          | <0.001              |
| L11           | 2.7     | 5.4            | 2.4        | 0.005              | 1.9           | 1.9 | 2.1 | 3.6 | 5.1  | 0.009               | 0.3                       | 1.1  | 2.1  | 10.0          | <0.001             | 1.5                   | 2.3  | 3.0  | 5.7           | 0.01                |
| L12           | 3.9     | 10.1           | 3.0        | <0.001             | 5.7           | 2.3 | 2.9 | 5.4 | 3.6  | 0.13 <sup>a</sup>   | 0.0                       | 2.4  | 5.4  | 9.9           | <0.001             | 0.3                   | 2.9  | 4.9  | 12.9          | <0.001              |
| L13           | 1.9     | 4.6            | 1.6        | 0.050              | 1.9           | 1.6 | 1.4 | 6.3 | 2.1  | 0.40 <sup>a</sup>   | 0.0                       | 1.0  | 2.1  | 6.4           | 0.001 <sup>a</sup> | 0.0                   | 1.3  | 3.2  | 5.3           | 0.01 <sup>a</sup>   |

<sup>a</sup>Fisher's exact test.**Table S2** LNM rates (%) of the enrolled patients who were diagnosed with squamous cell carcinomas (N=162)

| Nodal station | Overall | Tumor location |            |                    | Lobes of lung |      |     |      |      |                    | 8th Pathological T status |      |      |               |                   | 8th clinical T status |      |      |               |                    |
|---------------|---------|----------------|------------|--------------------|---------------|------|-----|------|------|--------------------|---------------------------|------|------|---------------|-------------------|-----------------------|------|------|---------------|--------------------|
|               |         | Central        | Peripheral | P                  | LUL           | LLL  | RUL | RML  | RLL  | P                  | pT1a                      | pT1b | pT1c | pT2 and above | P                 | cT1a                  | cT1b | cT1c | cT2 and above | P                  |
| 2R/2L         | 1.1     | 1.4            | 0.0        | >0.99 <sup>a</sup> | –             | –    | 1.1 | 0.0  | 1.3  | >0.99 <sup>a</sup> | 0.0                       | 0.0  | 0.0  | 2.6           | 0.51 <sup>a</sup> | 0.0                   | 0.0  | 0.0  | 2.4           | 0.69 <sup>a</sup>  |
| 3A/3P         | 0       | 0.0            | 0.0        | –                  | 0.0           | 0.0  | 0.0 | 0.0  | 0.0  | –                  | 0.0                       | 0.0  | 0.0  | 0.0           | –                 | 0.0                   | 0.0  | 0.0  | 0.0           | –                  |
| 4R/4L         | 0       | 0.0            | 0.0        | –                  | 0.0           | 0.0  | 0.0 | 0.0  | 0.0  | –                  | 0.0                       | 0.0  | 0.0  | 0.0           | –                 | 0.0                   | 0.0  | 0.0  | 0.0           | –                  |
| L5            | 2.6     | 2.1            | 5.0        | 0.44 <sup>a</sup>  | 4.5           | 0.0  | –   | –    | –    | 0.28 <sup>a</sup>  | 0.0                       | 0.0  | 0.0  | 5.2           | 0.82 <sup>a</sup> | 0.0                   | 0.0  | 0.0  | 5.0           | 0.67 <sup>a</sup>  |
| L6            | 0       | 0.0            | 0.0        | –                  | 0.0           | 0.0  | 0.0 | 0.0  | 0.0  | –                  | 0.0                       | 0.0  | 0.0  | 0.0           | –                 | 0.0                   | 0.0  | 0.0  | 0.0           | –                  |
| L7            | 2.9     | 4.0            | 0.0        | 0.09 <sup>a</sup>  | 0.0           | 6.6  | 0.0 | 0.0  | 3.4  | 0.07 <sup>a</sup>  | 0.0                       | 1.3  | 1.1  | 4.5           | 0.34 <sup>a</sup> | 0.0                   | 3.0  | 0.0  | 4.1           | 0.39 <sup>a</sup>  |
| L8            | 0       | 0.0            | 0.0        | –                  | 0.0           | 0.0  | 0.0 | 0.0  | 0.0  | –                  | 0.0                       | 0.0  | 0.0  | 0.0           | –                 | 0.0                   | 0.0  | 0.0  | 0.0           | –                  |
| L9            | 0       | 0.0            | 0.0        | –                  | 0.0           | 0.0  | 0.0 | 0.0  | 0.0  | –                  | 0.0                       | 0.0  | 0.0  | 0.0           | –                 | 0.0                   | 0.0  | 0.0  | 0.0           | –                  |
| L10           | 4.5     | 5.3            | 2.1        | 0.12               | 3.1           | 7.1  | 3.4 | 14.3 | 2.9  | 0.19 <sup>a</sup>  | 0.0                       | 6.2  | 1.9  | 5.5           | 0.08 <sup>a</sup> | 0.0                   | 3.4  | 7.1  | 3.8           | 0.44 <sup>a</sup>  |
| L11           | 4.9     | 5.2            | 3.9        | 0.86 <sup>a</sup>  | 4.0           | 5.0  | 7.7 | 0.0  | 4.3  | 0.82 <sup>a</sup>  | 0.0                       | 2.9  | 4.7  | 6.4           | 0.51 <sup>a</sup> | 0.0                   | 4.8  | 10.8 | 3.0           | 0.06 <sup>a</sup>  |
| L12           | 6.7     | 8.1            | 2.9        | 0.25 <sup>a</sup>  | 2.6           | 12.3 | 0.0 | 25.0 | 12.0 | 0.002 <sup>a</sup> | 20.0                      | 6.3  | 6.6  | 5.8           | 0.66 <sup>a</sup> | 0.0                   | 5.6  | 6.5  | 8.3           | 0.93 <sup>a</sup>  |
| L13           | 4.8     | 4.9            | 4.7        | >0.99 <sup>a</sup> | 5.3           | 4.8  | 8.3 | 0.0  | 0.0  | 0.89 <sup>a</sup>  | 0.0                       | 10.5 | 2.7  | 4.8           | 0.57 <sup>a</sup> | 0.0                   | 6.7  | 3.4  | 5.6           | >0.99 <sup>a</sup> |

<sup>a</sup>Fisher's exact test.**Table S3** LNM rates (%) of the enrolled patients who were diagnosed with adenocarcinomas in central lung cancer (N=130)

| Nodal station | Overall | Lobes of lung |      |     |      |      |                    | 8th Pathological T status |      |      |               |                    | 8th clinical T status |      |      |               | P                   |
|---------------|---------|---------------|------|-----|------|------|--------------------|---------------------------|------|------|---------------|--------------------|-----------------------|------|------|---------------|---------------------|
|               |         | LUL           | LLL  | RUL | RML  | RLL  | P                  | pT1a                      | pT1b | pT1c | pT2 and above | P                  | cT1a                  | cT1b | cT1c | cT2 and above |                     |
| 2R/2L         | 8.8     | –             | –    | 3.4 | 8.3  | 22.9 | 0.003 <sup>a</sup> | 0.0                       | 8.3  | 0.0  | 11.9          | 0.30 <sup>a</sup>  | 0.0                   | 9.3  | 8.6  | 8.6           | >0.99 <sup>a</sup>  |
| 3A/3P         | 0.0     | 0.0           | 0.0  | 0.0 | 0.0  | 0.0  | –                  | 0.0                       | 0.0  | 0.0  | 0.0           | –                  | 0.0                   | 0.0  | 0.0  | 0.0           | –                   |
| 4R/4L         | 5.7     | 7.1           | 20.0 | 0.0 | 0.0  | 12.5 | 0.16               | 0.0                       | 0.0  | 0.0  | 7.5           | >0.99 <sup>a</sup> | 0.0                   | 0.0  | 0.0  | 10.3          | 0.41 <sup>a</sup>   |
| L5            | 6.8     | 10.3          | 0.0  | –   | –    | –    | 0.18 <sup>a</sup>  | 0.0                       | 11.1 | 0.0  | 9.1           | 0.60 <sup>a</sup>  | 0.0                   | 11.1 | 4.8  | 5.0           | 0.68 <sup>a</sup>   |
| L6            | 0.0     | 0.0           | 0.0  | 0.0 | 0.0  | 0.0  | –                  | 0.0                       | 0.0  | 0.0  | 0.0           | –                  | 0.0                   | 0.0  | 0.0  | 0.0           | –                   |
| L7            | 6.8     | 0.0           | 0.0  | 1.3 | 10.0 | 20.3 | 0.000 <sup>a</sup> | 0.0                       | 1.2  | 12.5 | 9.4           | 0.03 <sup>a</sup>  | 0.0                   | 1.1  | 0.0  | 16.5          | <0.001 <sup>a</sup> |
| L8            | 0.0     | 0.0           | 0.0  | 0.0 | 0.0  | 0.0  | –                  | 0.0                       | 0.0  | 0.0  | 0.0           | –                  | 0.0                   | 0.0  | 0.0  | 0.0           | –                   |
| L9            | 5.7     | 0.0           | 0.0  | 0.0 | 0.0  | 13.0 | 0.50 <sup>a</sup>  | 0.0                       | 5.3  | 8.3  | 4.8           | >0.99 <sup>a</sup> | 0.0                   | 4.2  | 0.0  | 10.5          | 0.58 <sup>a</sup>   |
| L10           | 7.2     | 5.7           | 3.8  | 6.0 | 20.0 | 9.4  | 0.30 <sup>a</sup>  | 0.0                       | 1.0  | 5.6  | 12.0          | 0.004 <sup>a</sup> | 0.0                   | 1.7  | 8.0  | 11.2          | 0.02 <sup>a</sup>   |
| L11           | 5.4     | 1.4           | 2.9  | 3.5 | 16.7 | 12.0 | 0.02 <sup>a</sup>  | 0.0                       | 3.4  | 3.3  | 8.3           | 0.42 <sup>a</sup>  | 0.0                   | 5.2  | 3.1  | 7.2           | 0.61 <sup>a</sup>   |
| L12           | 10.1    | 14.1          | 0.0  | 7.7 | 22.2 | 9.8  | 0.22 <sup>a</sup>  | 0.0                       | 10.3 | 8.3  | 11.1          | 0.96 <sup>a</sup>  | 0.0                   | 12.2 | 7.0  | 10.8          | 0.74 <sup>a</sup>   |
| L13           | 4.6     | 0.0           | 7.7  | 0.0 | 0.0  | 9.7  | 0.28 <sup>a</sup>  | 0.0                       | 5.3  | 0.0  | 7.1           | 0.84 <sup>a</sup>  | 0.0                   | 5.1  | 0.0  | 10.5          | 0.33 <sup>a</sup>   |

<sup>a</sup>Fisher's exact test.**Table S4** Occurrence of LNM in patients with T stage

|                      | N0 (N=1150) | N1 (N=76) | N2 (N=82) | Total |
|----------------------|-------------|-----------|-----------|-------|
| pT1a, n (%)          | 189 (99.0)  | 2 (1.0)   | 0         | 191   |
| pT1b, n (%)          | 587 (93.9)  | 16 (2.6)  | 22 (3.5)  | 625   |
| pT1c, n (%)          | 217 (87.2)  | 18 (7.2)  | 14 (5.6)  | 249   |
| pT2 and above, n (%) | 157 (64.6)  | 40 (16.5) | 46 (18.9) | 243   |
